# Supplementary material for: Eu3+-doped Tb3+ metal–organic frameworks emitting tunable three primary colors towards white light
Source: Royal Society of Chemistry journal article supplement (doi:10.1039/c3tc30733f), 2013-01-01

## Electronic Supplementary Information (ESI)

# Eu<sup>3+</sup>-doped Tb(III)-Zn(II) metal–organic frameworks emitting tunable three primary colors towards white light

Zhi-Fa Liu,<sup>ab</sup> Mei-Feng Wu,<sup>c</sup> Shuai-Hua Wang,<sup>ab</sup> Fa-Kun Zheng,<sup>\*a</sup> Guan-E Wang,<sup>ab</sup> Jun Chen,<sup>ab</sup> Yu Xiao,<sup>ab</sup> A-Qing Wu,<sup>a</sup> Guo-Cong Guo<sup>\*a</sup> and Jin-Shun Huang<sup>a</sup>

<sup>a</sup> State Key Laboratory of Structural Chemistry, Fujian Institute of Research on the Structure of Matter, Chinese Academy of Sciences, Fuzhou, Fujian 350002, P. R. China.

<sup>b</sup> Graduate school, University of Chinese Academy of Sciences, Beijing 100049, P. R. China.

<sup>c</sup> School of Environmental and Chemical Engineering, Nanchang Hangkong University, Nanchang, Jiangxi 330063, P. R. China.

Fax: (+86) 591-83714946; Tel:86-591-83704827; E-mail: [zfk@fjirsm.ac.cn](mailto:zfk@fjirsm.ac.cn)

**Table S1** Selected bond distances and angles for **1-Eu** and **2-Tb**.

| 1-Eu           |          |               |          |
|----------------|----------|---------------|----------|
| Eu(1)-O(11)    | 2.288(3) | Eu(2)-O(12)   | 2.298(4) |
| Eu(1)-O(21)    | 2.320(3) | Eu(2)-O(41)   | 2.310(3) |
| Eu(1)-O(52)    | 2.344(3) | Eu(2)-O(22)   | 2.330(3) |
| Eu(1)-O(8W)    | 2.416(5) | Eu(2)-O(51)   | 2.362(4) |
| Eu(1)-O(7W)    | 2.443(4) | Eu(2)-O(42)#1 | 2.381(3) |
| Eu(1)-O(9W)    | 2.520(4) | Eu(2)-O(32)   | 2.491(3) |
| Eu(1)-O(6W)    | 2.521(4) | Eu(2)-O(31)   | 2.503(3) |
| Eu(1)-O(10W)   | 2.548(4) | Eu(2)-O(11W)  | 2.562(4) |
| Eu(3)-O(1W)    | 2.375(5) | Zn(1)-N(43)#3 | 1.990(4) |
| Eu(3)-O(2W)    | 2.401(8) | Zn(1)-N(32)   | 1.995(4) |
| Eu(3)-O(5WA)#2 | 2.403(8) | Zn(1)-N(11)#4 | 2.004(4) |
| Eu(3)-O(3W)    | 2.407(8) | Zn(1)-N(54)#1 | 2.005(4) |
| Eu(3)-O(4W)    | 2.462(7) | Eu(3)-O(5WB)  | 2.512(9) |

|                     |            |                        |            |
|---------------------|------------|------------------------|------------|
| Eu(3)-O(1W)#2       | 2.492(5)   |                        |            |
| O(11)-Eu(1)-O(21)   | 125.69(12) | O(11)-Eu(1)-O(6W)      | 143.07(13) |
| O(11)-Eu(1)-O(52)   | 80.82(13)  | O(21)-Eu(1)-O(6W)      | 80.21(12)  |
| O(21)-Eu(1)-O(52)   | 80.05(12)  | O(52)-Eu(1)-O(6W)      | 78.59(13)  |
| O(11)-Eu(1)-O(8W)   | 75.91(15)  | O(8W)-Eu(1)-O(6W)      | 70.42(14)  |
| O(21)-Eu(1)-O(8W)   | 146.89(14) | O(7W)-Eu(1)-O(6W)      | 68.52(14)  |
| O(52)-Eu(1)-O(8W)   | 79.49(14)  | O(9W)-Eu(1)-O(6W)      | 109.01(14) |
| O(11)-Eu(1)-O(7W)   | 135.89(14) | O(11)-Eu(1)-O(10W)     | 78.03(13)  |
| O(21)-Eu(1)-O(7W)   | 78.48(13)  | O(21)-Eu(1)-O(10W)     | 72.46(12)  |
| O(52)-Eu(1)-O(7W)   | 143.17(14) | O(52)-Eu(1)-O(10W)     | 124.65(12) |
| O(8W)-Eu(1)-O(7W)   | 103.63(15) | O(8W)-Eu(1)-O(10W)     | 140.54(14) |
| O(11)-Eu(1)-O(9W)   | 70.93(13)  | O(7W)-Eu(1)-O(10W)     | 75.97(13)  |
| O(21)-Eu(1)-O(9W)   | 138.04(12) | O(9W)-Eu(1)-O(10W)     | 75.11(14)  |
| O(52)-Eu(1)-O(9W)   | 141.38(13) | O(6W)-Eu(1)-O(10W)     | 138.68(12) |
| O(8W)-Eu(1)-O(9W)   | 68.64(15)  | O(12)-Eu(2)-O(22)      | 93.62(14)  |
| O(7W)-Eu(1)-O(9W)   | 68.30(13)  | O(41)-Eu(2)-O(22)      | 88.83(13)  |
| O(12)-Eu(2)-O(41)   | 156.45(13) | O(12)-Eu(2)-O(51)      | 75.43(15)  |
| O(41)-Eu(2)-O(51)   | 82.88(13)  | O(1W)-Eu(3)-O(4W)      | 84.6(2)    |
| O(22)-Eu(2)-O(51)   | 73.51(14)  | O(2W)-Eu(3)-O(4W)      | 81.7(3)    |
| O(12)-Eu(2)-O(42)#1 | 80.73(13)  | O(5WA)#2-Eu(3)-O(4W)   | 111.2(3)   |
| O(41)-Eu(2)-O(42)#1 | 108.52(12) | O(3W)-Eu(3)-O(4W)      | 69.2(3)    |
| O(22)-Eu(2)-O(42)#1 | 148.77(14) | O(1W)-Eu(3)-O(1W)#2    | 127.79(11) |
| O(51)-Eu(2)-O(42)#1 | 132.88(14) | O(2W)-Eu(3)-O(1W)#2    | 79.9(2)    |
| O(12)-Eu(2)-O(32)   | 125.54(13) | O(5WA)#2-Eu(3)-O(1W)#2 | 76.8(3)    |
| O(41)-Eu(2)-O(32)   | 78.01(11)  | O(3W)-Eu(3)-O(1W)#2    | 82.1(2)    |
| O(22)-Eu(2)-O(32)   | 83.03(12)  | O(4W)-Eu(3)-O(1W)#2    | 146.7(2)   |
| O(51)-Eu(2)-O(32)   | 149.93(14) | O(2W)-Eu(3)-O(5WA)#2   | 152.8(3)   |
| O(42)#1-Eu(2)-O(32) | 75.81(12)  | O(1W)-Eu(3)-O(3W)      | 128.7(2)   |
| O(12)-Eu(2)-O(31)   | 75.36(13)  | O(2W)-Eu(3)-O(3W)      | 86.3(3)    |

|                      |            |                       |            |
|----------------------|------------|-----------------------|------------|
| O(41)-Eu(2)-O(31)    | 127.15(11) | O(5WA)#2-Eu(3)-O(3W)  | 76.9(3)    |
| O(22)-Eu(2)-O(31)    | 70.75(13)  | O(1W)-Eu(3)-O(5WB)    | 62.3(2)    |
| O(51)-Eu(2)-O(31)    | 131.58(13) | O(2W)-Eu(3)-O(5WB)    | 72.0(3)    |
| O(42)#1-Eu(2)-O(31)  | 78.13(12)  | O(5WA)#2-Eu(3)-O(5WB) | 132.2(3)   |
| O(32)-Eu(2)-O(31)    | 52.15(10)  | O(3W)-Eu(3)-O(5WB)    | 145.5(3)   |
| O(12)-Eu(2)-O(11W)   | 86.27(14)  | O(4W)-Eu(3)-O(5WB)    | 81.1(3)    |
| O(41)-Eu(2)-O(11W)   | 77.00(13)  | O(1W)#2-Eu(3)-O(5WB)  | 118.5(2)   |
| O(22)-Eu(2)-O(11W)   | 139.93(14) | N(43)#3-Zn(1)-N(32)   | 112.85(17) |
| O(51)-Eu(2)-O(11W)   | 67.70(15)  | N(43)#3-Zn(1)-N(11)#4 | 111.51(16) |
| O(42)#1-Eu(2)-O(11W) | 70.75(14)  | N(32)-Zn(1)-N(11)#4   | 102.83(17) |
| O(32)-Eu(2)-O(11W)   | 128.55(12) | N(43)#3-Zn(1)-N(54)#1 | 99.63(18)  |
| O(31)-Eu(2)-O(11W)   | 146.01(14) | N(32)-Zn(1)-N(54)#1   | 120.65(16) |
| O(1W)-Eu(3)-O(2W)    | 133.7(2)   | N(11)#4-Zn(1)-N(54)#1 | 109.57(17) |
| O(1W)-Eu(3)-O(5WA)#2 | 72.8(2)    |                       |            |

Symmetry codes for **1-Eu**: (#1)  $-x + 1, -y + 1, -z + 1$ ; (#2)  $-x, -y + 2, -z + 2$ ; (#3)  $x - 1, y, z - 1$ ; (#4)  $x - 1, y - 1, z - 1$ .

---

**2-Tb**

---

|              |           |               |          |
|--------------|-----------|---------------|----------|
| Tb(1)-O(11)  | 2.260(7)  | Tb(2)-O(42)#3 | 2.344(6) |
| Tb(1)-O(21)  | 2.286(6)  | O(11W)-Tb(2)  | 2.554(8) |
| Tb(1)-O(52)  | 2.309(7)  | O(12)-Tb(2)   | 2.272(8) |
| Tb(1)-O(8W)  | 2.373(7)  | O(22)-Tb(2)   | 2.314(6) |
| Tb(1)-O(7W)  | 2.422(7)  | O(31)-Tb(2)   | 2.484(7) |
| Tb(1)-O(6W)  | 2.483(7)  | O(32)-Tb(2)   | 2.469(5) |
| Tb(1)-O(9W)  | 2.500(8)  | O(51)-Tb(2)   | 2.340(7) |
| Tb(1)-O(10W) | 2.554(6)  | O(41)-Tb(2)   | 2.276(6) |
| Tb(3)-O(1W)  | 2.447(9)  | Zn(1)-N(11)#1 | 1.985(8) |
| Tb(3)-O(2W)  | 2.379(14) | Zn(1)-N(43)#2 | 1.990(8) |
| Tb(3)-O(3W)  | 2.356(15) | Zn(1)-N(32)   | 1.994(7) |
| Tb(3)-O(4W)  | 2.443(10) | Zn(1)-N(54)#3 | 1.995(8) |

|                    |           |                      |           |
|--------------------|-----------|----------------------|-----------|
| Tb(3)-O(5WB)       | 2.535(18) | Tb(3)-O(1W)#4        | 2.375(10) |
| Tb(3)-O(5WA)#4     | 2.354(14) |                      |           |
| O(11)-Tb(1)-O(21)  | 125.3(2)  | O(12)-Tb(2)-O(41)    | 155.5(2)  |
| O(11)-Tb(1)-O(52)  | 80.0(3)   | O(12)-Tb(2)-O(22)    | 93.8(3)   |
| O(21)-Tb(1)-O(52)  | 80.5(2)   | O(41)-Tb(2)-O(22)    | 89.8(2)   |
| O(11)-Tb(1)-O(8W)  | 76.7(3)   | O(12)-Tb(2)-O(51)    | 75.8(3)   |
| O(21)-Tb(1)-O(8W)  | 146.5(2)  | O(41)-Tb(2)-O(51)    | 82.1(2)   |
| O(52)-Tb(1)-O(8W)  | 79.3(3)   | O(22)-Tb(2)-O(51)    | 73.3(3)   |
| O(11)-Tb(1)-O(7W)  | 135.3(3)  | O(12)-Tb(2)-O(42)#3  | 81.0(3)   |
| O(21)-Tb(1)-O(7W)  | 78.3(2)   | O(41)-Tb(2)-O(42)#3  | 107.7(2)  |
| O(52)-Tb(1)-O(7W)  | 144.7(3)  | O(22)-Tb(2)-O(42)#3  | 148.5(2)  |
| O(8W)-Tb(1)-O(7W)  | 104.2(3)  | O(51)-Tb(2)-O(42)#3  | 133.7(3)  |
| O(11)-Tb(1)-O(6W)  | 144.2(2)  | O(12)-Tb(2)-O(32)    | 127.2(2)  |
| O(21)-Tb(1)-O(6W)  | 79.6(2)   | O(41)-Tb(2)-O(32)    | 77.3(2)   |
| O(52)-Tb(1)-O(6W)  | 79.7(2)   | O(22)-Tb(2)-O(32)    | 82.8(2)   |
| O(8W)-Tb(1)-O(6W)  | 70.7(2)   | O(51)-Tb(2)-O(32)    | 148.3(3)  |
| O(7W)-Tb(1)-O(6W)  | 69.0(2)   | O(42)#3-Tb(2)-O(32)  | 76.1(2)   |
| O(11)-Tb(1)-O(9W)  | 71.0(2)   | O(12)-Tb(2)-O(31)    | 76.5(2)   |
| O(21)-Tb(1)-O(9W)  | 138.0(2)  | O(41)-Tb(2)-O(31)    | 127.3(2)  |
| O(52)-Tb(1)-O(9W)  | 140.9(2)  | O(22)-Tb(2)-O(31)    | 70.9(2)   |
| O(8W)-Tb(1)-O(9W)  | 69.0(3)   | O(51)-Tb(2)-O(31)    | 132.4(2)  |
| O(7W)-Tb(1)-O(9W)  | 68.1(2)   | O(42)#3-Tb(2)-O(31)  | 77.8(2)   |
| O(6W)-Tb(1)-O(9W)  | 109.4(2)  | O(32)-Tb(2)-O(31)    | 52.61(19) |
| O(11)-Tb(1)-O(10W) | 77.7(2)   | O(12)-Tb(2)-O(11W)   | 85.5(3)   |
| O(21)-Tb(1)-O(10W) | 72.1(2)   | O(41)-Tb(2)-O(11W)   | 76.2(2)   |
| O(52)-Tb(1)-O(10W) | 123.8(2)  | O(22)-Tb(2)-O(11W)   | 139.7(2)  |
| O(8W)-Tb(1)-O(10W) | 141.3(2)  | O(51)-Tb(2)-O(11W)   | 67.5(3)   |
| O(7W)-Tb(1)-O(10W) | 75.2(2)   | O(42)#3-Tb(2)-O(11W) | 71.3(2)   |
| O(6W)-Tb(1)-O(10W) | 137.9(2)  | O(32)-Tb(2)-O(11W)   | 128.6(2)  |

|                        |          |                       |          |
|------------------------|----------|-----------------------|----------|
| O(9W)-Tb(1)-O(10W)     | 75.4(2)  | O(31)-Tb(2)-O(11W)    | 146.2(3) |
| O(3W)-Tb(3)-O(5WA)#4   | 80.4(5)  | O(3W)-Tb(3)-O(5WB)    | 143.2(5) |
| O(3W)-Tb(3)-O(2W)      | 82.7(5)  | O(5WA)#4-Tb(3)-O(5WB) | 129.1(5) |
| O(5WA)#4-Tb(3)-O(2W)   | 157.2(6) | O(4W)-Tb(3)-O(5WB)    | 80.0(4)  |
| O(3W)-Tb(3)-O(1W)#4    | 84.8(5)  | O(1W)-Tb(3)-O(5WB)    | 59.1(4)  |
| O(5WA)#4-Tb(3)-O(1W)#4 | 76.0(5)  | O(2W)-Tb(3)-O(1W)     | 131.2(5) |
| O(2W)-Tb(3)-O(1W)#4    | 87.2(5)  | O(1W)#4-Tb(3)-O(1W)   | 122.0(2) |
| O(3W)-Tb(3)-O(4W)      | 69.9(5)  | O(4W)-Tb(3)-O(1W)     | 82.2(3)  |
| O(5WA)#4-Tb(3)-O(4W)   | 105.6(5) | N(11)#1-Zn(1)-N(43)#2 | 111.4(3) |
| O(2W)-Tb(3)-O(4W)      | 82.7(4)  | N(11)#1-Zn(1)-N(32)   | 102.8(3) |
| O(1W)#4-Tb(3)-O(4W)    | 153.6(3) | N(43)#2-Zn(1)-N(32)   | 112.3(3) |
| O(3W)-Tb(3)-O(1W)      | 133.0(4) | N(11)#1-Zn(1)-N(54)#3 | 109.7(3) |
| O(5WA)#4-Tb(3)-O(1W)   | 71.5(5)  | N(43)#2-Zn(1)-N(54)#3 | 99.3(3)  |
| O(2W)-Tb(3)-O(5WB)     | 72.8(5)  | N(32)-Zn(1)-N(54)#3   | 121.6(3) |
| O(1W)#4-Tb(3)-O(5WB)   | 120.0(4) |                       |          |

Symmetry codes for **2-Tb**: (#1)  $x - 1, y - 1, z - 1$ ; (#2)  $x - 1, y, z - 1$ ; (#3)  $-x + 1, -y + 1, -z + 1$ ; (#4)  $-x, -y + 2, -z + 2$ .

---

**Table S2** Selected hydrogen-bonding geometries for **1-Eu** and **2-Tb**.

| D-H...A             | D-H/Å   | H...A/Å | D...A/Å   | ∠D-H...A/° |
|---------------------|---------|---------|-----------|------------|
| <b>1-Eu</b>         |         |         |           |            |
| O6W-H6WA...N53_\$1  | 0.85(3) | 2.12(3) | 2.879(6)  | 149(3)     |
| O7W-H7WA...N22_\$2  | 0.86(3) | 1.84(3) | 2.689(7)  | 172(3)     |
| O8W-H8WB...N52_\$1  | 0.84(3) | 2.39(4) | 2.838(8)  | 114(3)     |
| O9W-H9WB...N31_\$3  | 0.84(2) | 2.21(3) | 2.934(6)  | 145(4)     |
| O10W-H10B...N21_\$2 | 0.86(3) | 2.34(3) | 3.127(7)  | 153(3)     |
| <b>2-Tb</b>         |         |         |           |            |
| O6W-H6WB...N53_\$1  | 0.82(4) | 2.03(4) | 2.852(12) | 176(3)     |
| O7W-H7WA...N22_\$2  | 0.81(3) | 1.89(4) | 2.667(12) | 160(4)     |
| O8W-H8WA...N12_\$1  | 0.82(5) | 2.07(5) | 2.885(12) | 168(4)     |
| O8W-H8WA...N13_\$3  | 0.82(5) | 2.54(5) | 3.200(13) | 138(3)     |
| O8W-H8WB...N52_\$3  | 0.82(4) | 2.28(7) | 2.806(14) | 122(7)     |
| O9W-H9WB...N31_\$2  | 0.82(4) | 2.15(4) | 2.900(11) | 151(7)     |
| O10W-H10B...N21_\$4 | 0.83(4) | 2.57(5) | 3.052(11) | 119(4)     |

Symmetry codes for **1-Eu**: \$1 2 - x, 1 - y, 2 - z; \$2 - x, - y, 1 - z; \$3 -x, 1 - y, -z; **2-Tb**: \$1 - x, -y, 1 - z; \$2 2 - x, 1 - y, 2 - z; \$3 1 - x, 2 - y, 2 - z; \$4 -x, 1 - y, 1 - z.

**Table S3** Corresponding CIE coordinates and CRI values of **1-Eu**, **2-Tb** and  $\text{Eu}^{3+}$ -doped **2-Tb** with different molar ratios excited at 330 nm.

|           |                   |                   |                   |                   |                   |                   |                   |
|-----------|-------------------|-------------------|-------------------|-------------------|-------------------|-------------------|-------------------|
| Sample    | <b>2-Tb</b>       | <b>0.1%</b>       | <b>0.3%</b>       | <b>0.4%</b>       | <b>0.5%</b>       | <b>0.6%</b>       | <b>0.7%</b>       |
| CIE (x,y) | (0.271,<br>0.398) | (0.302,<br>0.409) | (0.340,<br>0.391) | (0.326,<br>0.344) | (0.331,<br>0.328) | (0.352,<br>0.350) | (0.354,<br>0.358) |
| CCT       | 7886              | 6573              | 5272              | 5781              | 5562              | 4714              | 4681              |
| CRI       | 43.7              | 54.5              | 73.6              | 80.4              | 81.7              | 84.5              | 85.4              |
| Sample    | <b>1.0%</b>       | <b>1.5%</b>       | <b>8.0%</b>       | <b>20.0%</b>      | <b>40.0%</b>      | <b>1-Eu</b>       |                   |
| CIE (x,y) | (0.352,<br>0.334) | (0.391,<br>0.281) | (0.422,<br>0.252) | (0.487,<br>0.266) | (0.580,<br>0.309) | (0.617,<br>0.334) |                   |
| CCT       | 4051              | 2490              | 3679              | 10453             | 11884             | 10040             |                   |
| CRI       | 85.5              | 70.1              | 47.9              | 57.1              | 58.2              | 45.3              |                   |

**Fig. S1** Powdered X-ray diffraction (PXRD) patterns of **1-Eu**, **2-Tb**, and x%-Eu<sup>3+</sup>-doped **2-Tb**.

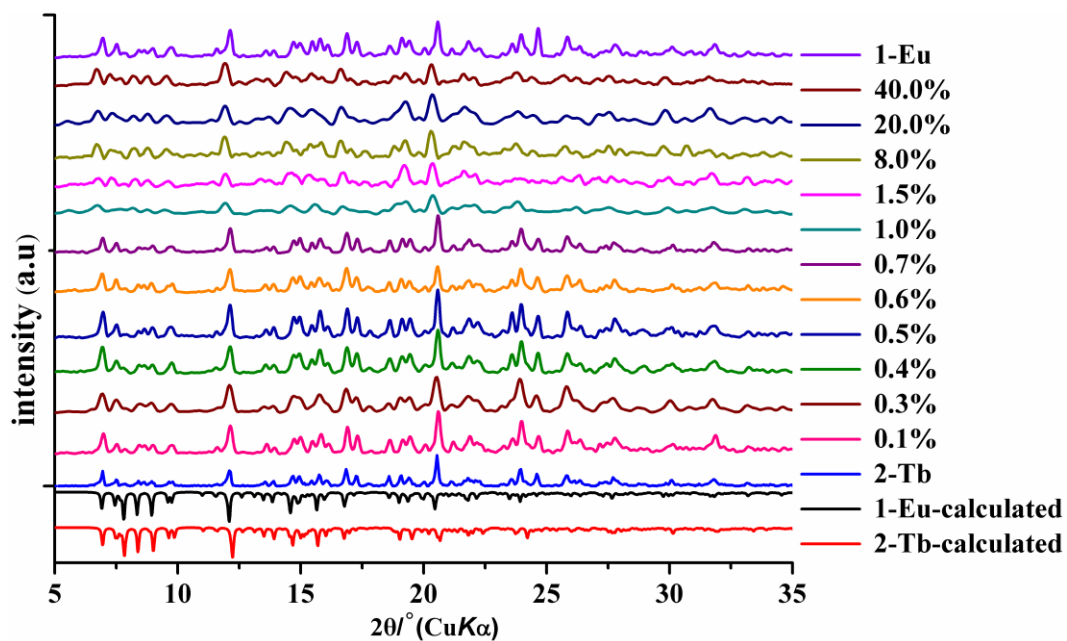

**Fig. S2** TG curves of **1-Eu**, **2-Tb**, 0.5% and 40.0% Eu<sup>3+</sup>-doped **2-Tb**.

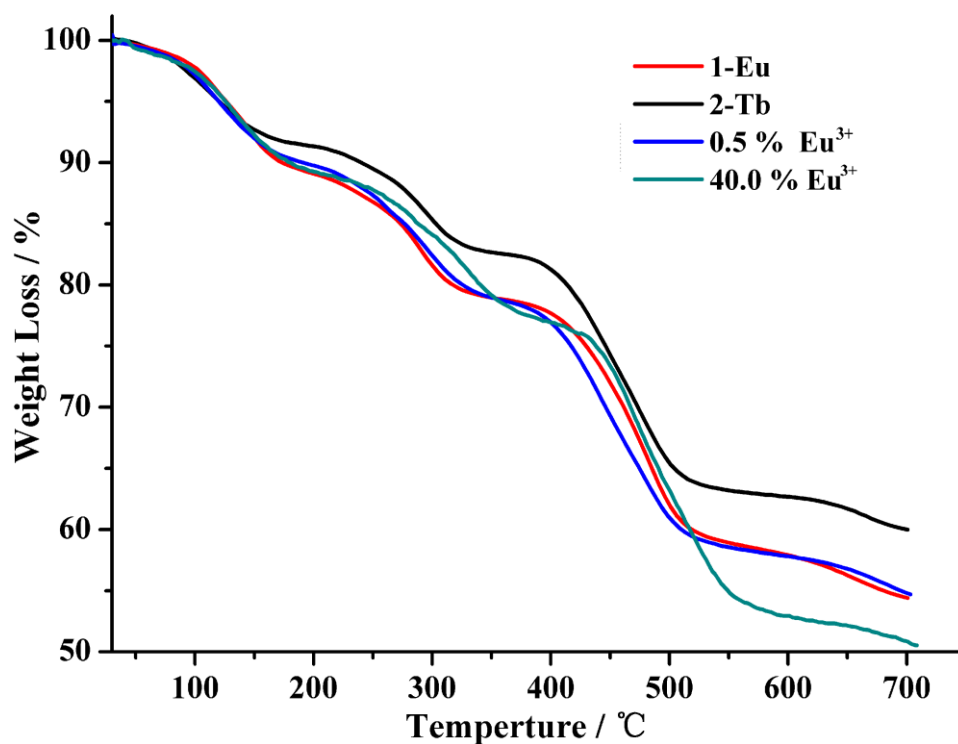



**Fig. S3** Schematic representation the tetranuclear cluster unit  $[\text{Eu}_4(\mu_2\text{-COO})_8]$  in the 2-D framework of **1-Eu**.

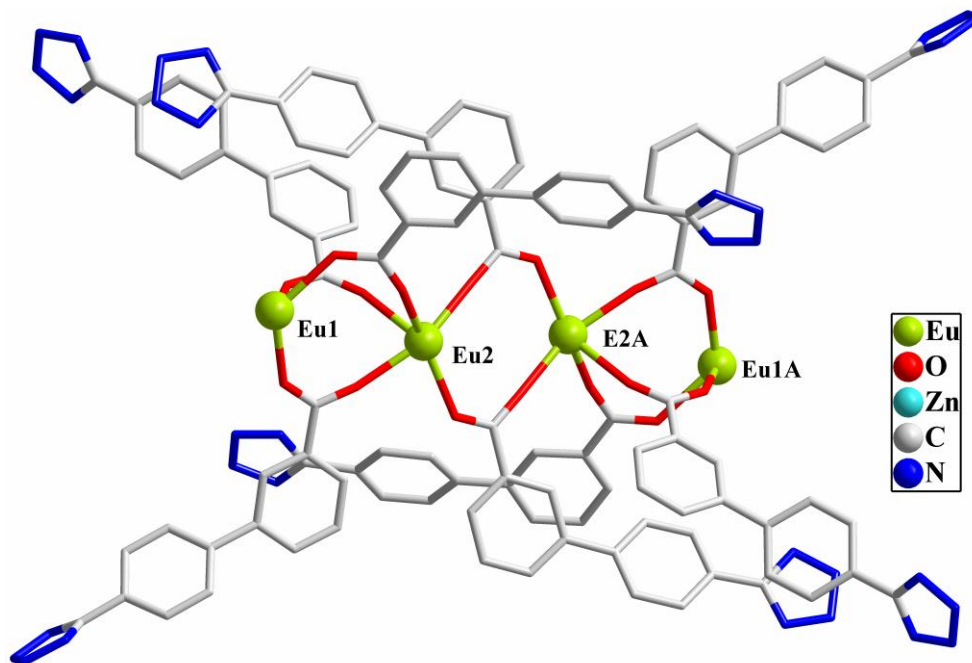

**Fig. S4** Schematic representation of the connection between the Zn(II) atom and tetranuclear cluster units  $[\text{Eu}_4(\mu_2\text{-COO})_8]$  by four 4-tbca<sup>2-</sup> ligand.

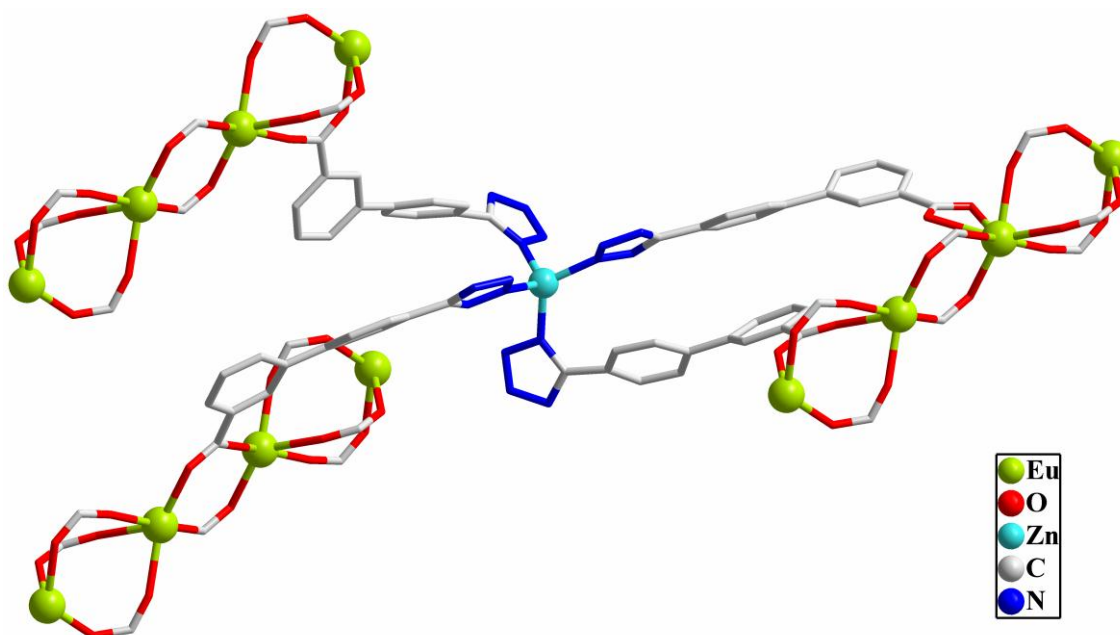

**Fig. S5** (a) Schematic representation of 3D supramolecular framework of **1-Eu** viewed along the *c* axis. The  $[\text{EuOH}(\text{H}_2\text{O})_6]^{2+}$  units are shown as space-filling models with lattice  $\text{H}_2\text{O}$  molecules omitted for clarity. (b) 1-D channel in the 3D supramolecular framework of **1-Eu**.

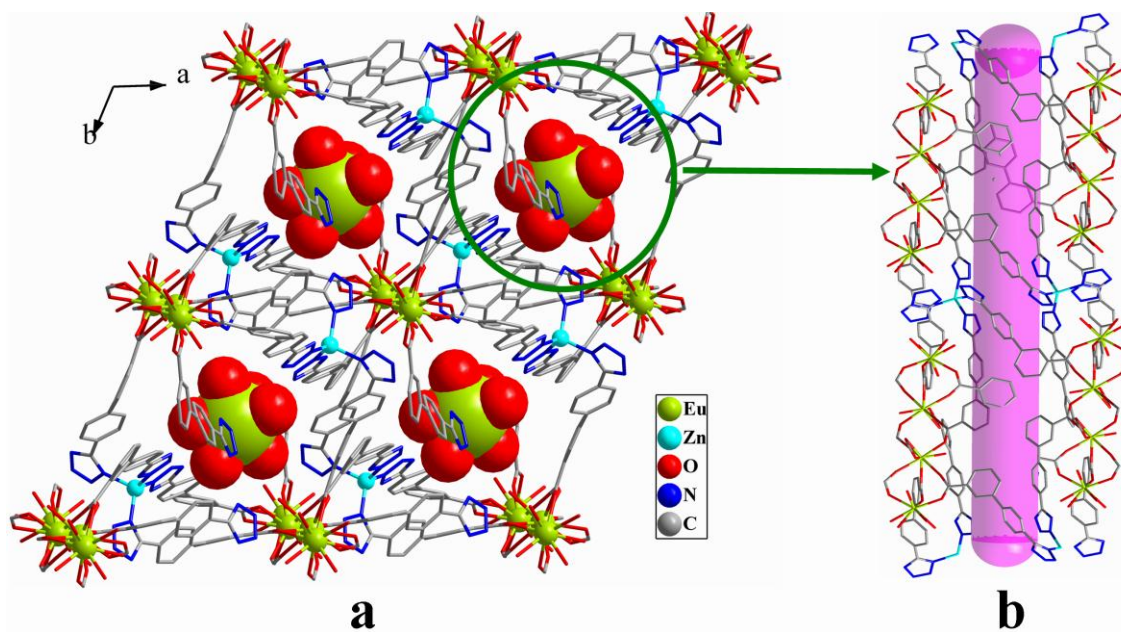

**Fig. S6** Excitation spectra of 4- $\text{H}_2\text{tbca}$ , **1-Eu** and 2-**Tb**.

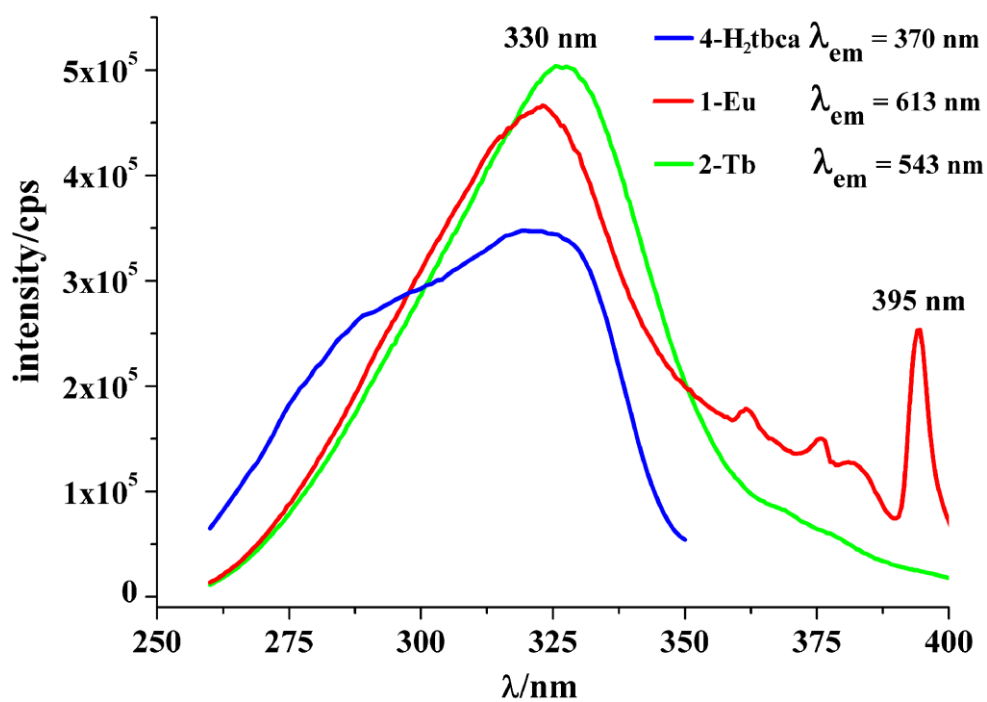

**Fig. S7** Luminescent decay curves of **1-Eu**, **2-Tb**, 0.5% and 2.0%  $\text{Eu}^{3+}$ -doped **2-Tb**.

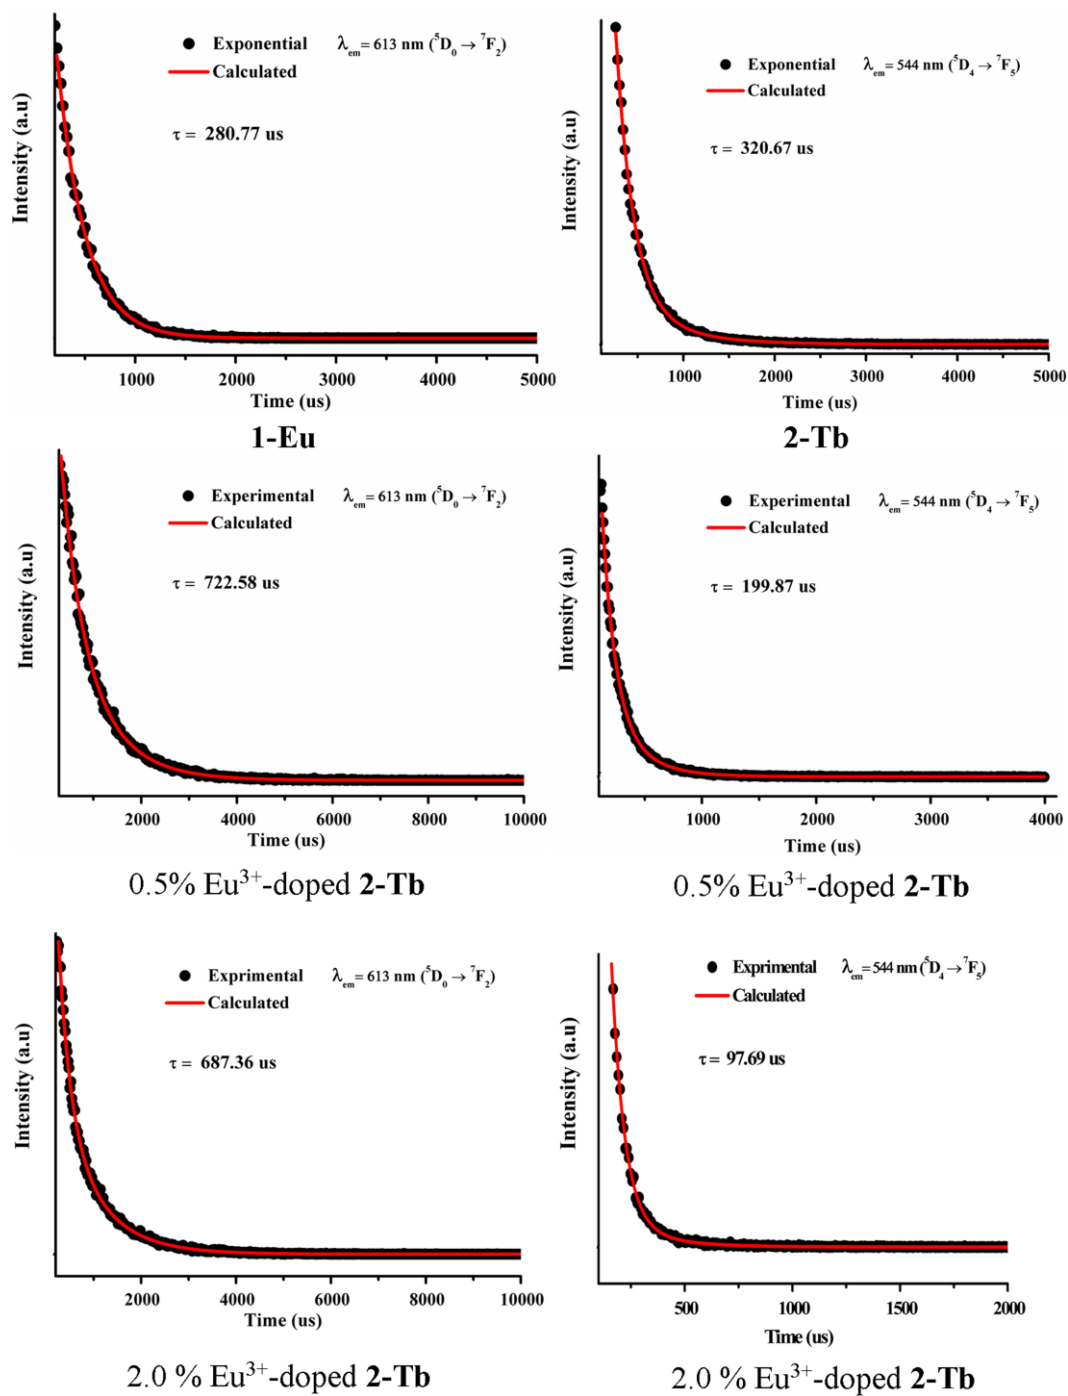

**Fig. S8** Excitation and emission spectra of 0.5%  $\text{Eu}^{3+}$ -doped 2-Tb.

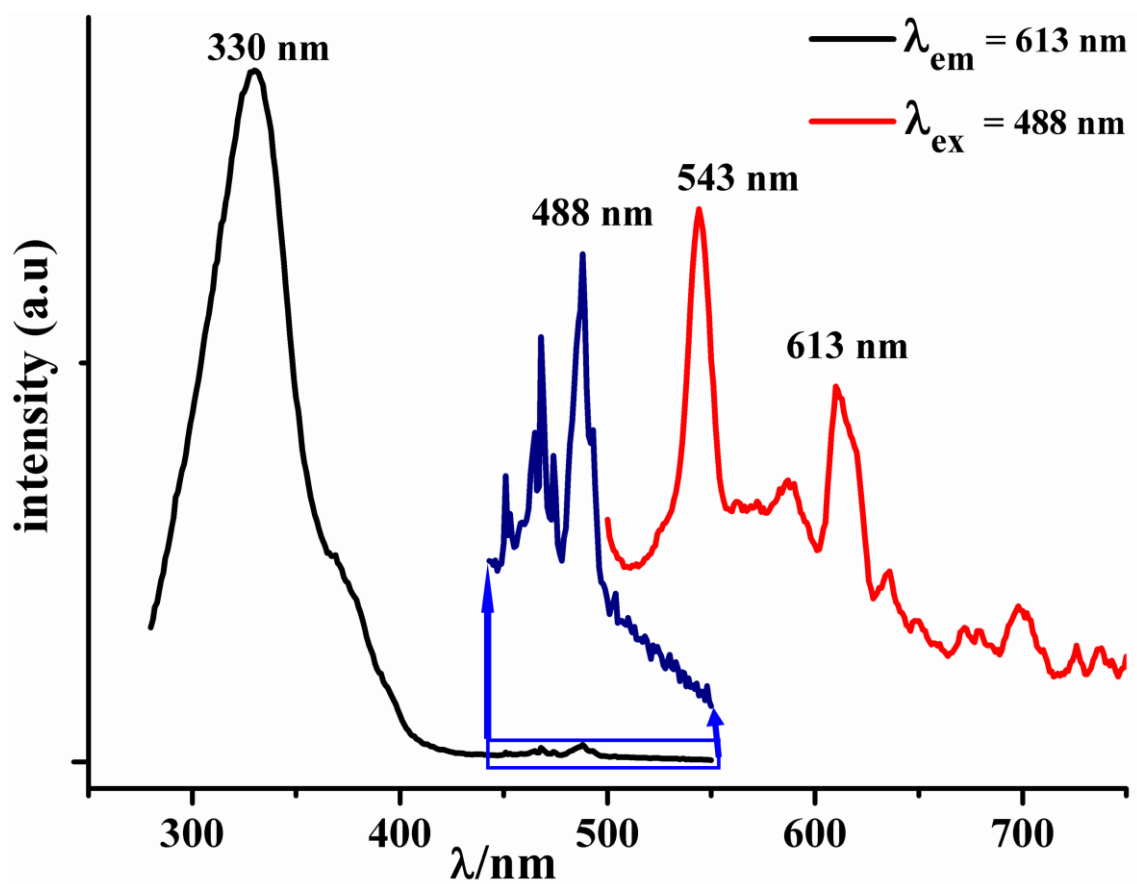

Supplement: c3tc30733f.pdf [file c3tc30733f.pdf]
